# Supplementary figures and images for: Effect of LSKL peptide on thrombospondin 1-mediated transforming growth factor β signal activation and liver regeneration after hepatectomy in an experimental model
Source: PubMed Central journal article supplement — Br J Surg. 2015 Apr 13;102(7):813–25. doi: 10.1002/bjs.9765 (PMC4654236; doi:10.1002/bjs.9765), 2015-04-13

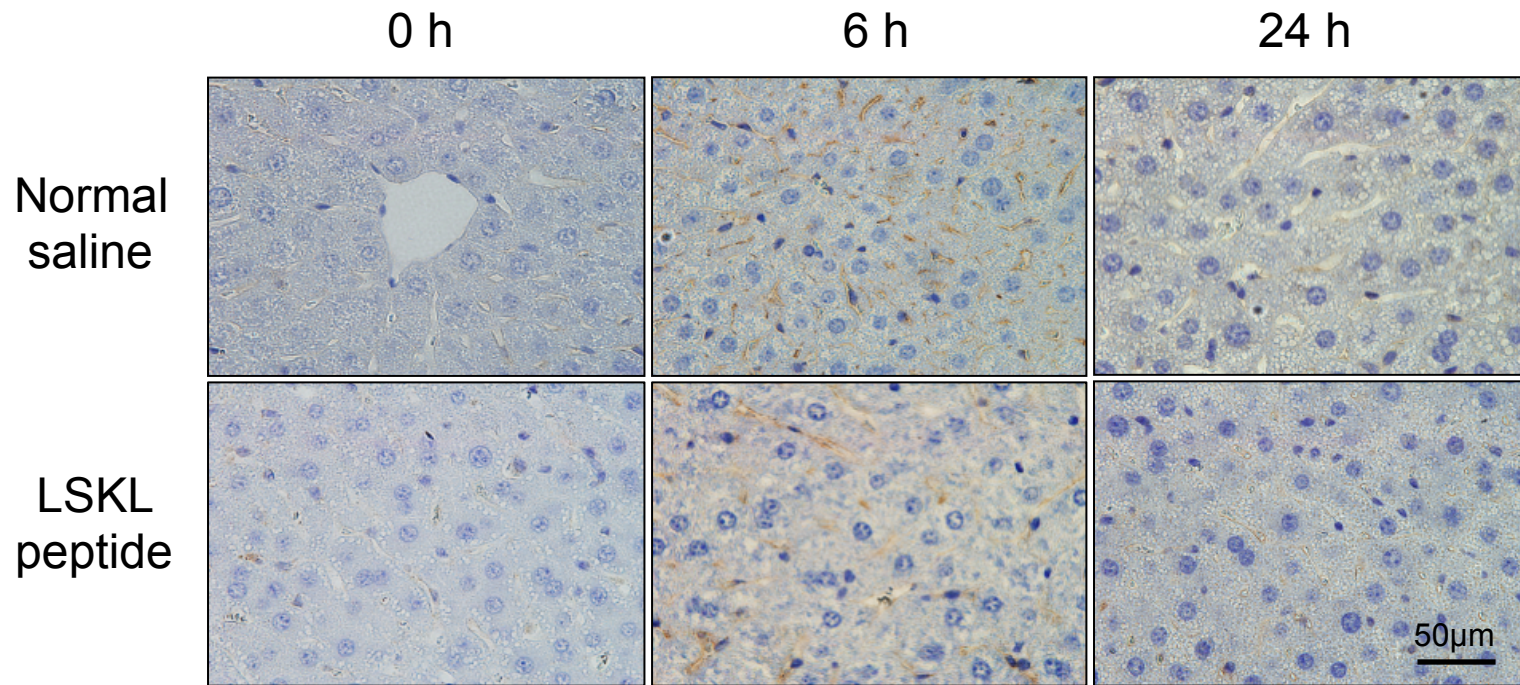

**Supplementary figure 1.**

Supplement: bjs0102-0813-sd3.pdf [file bjs0102-0813-sd3.pdf]

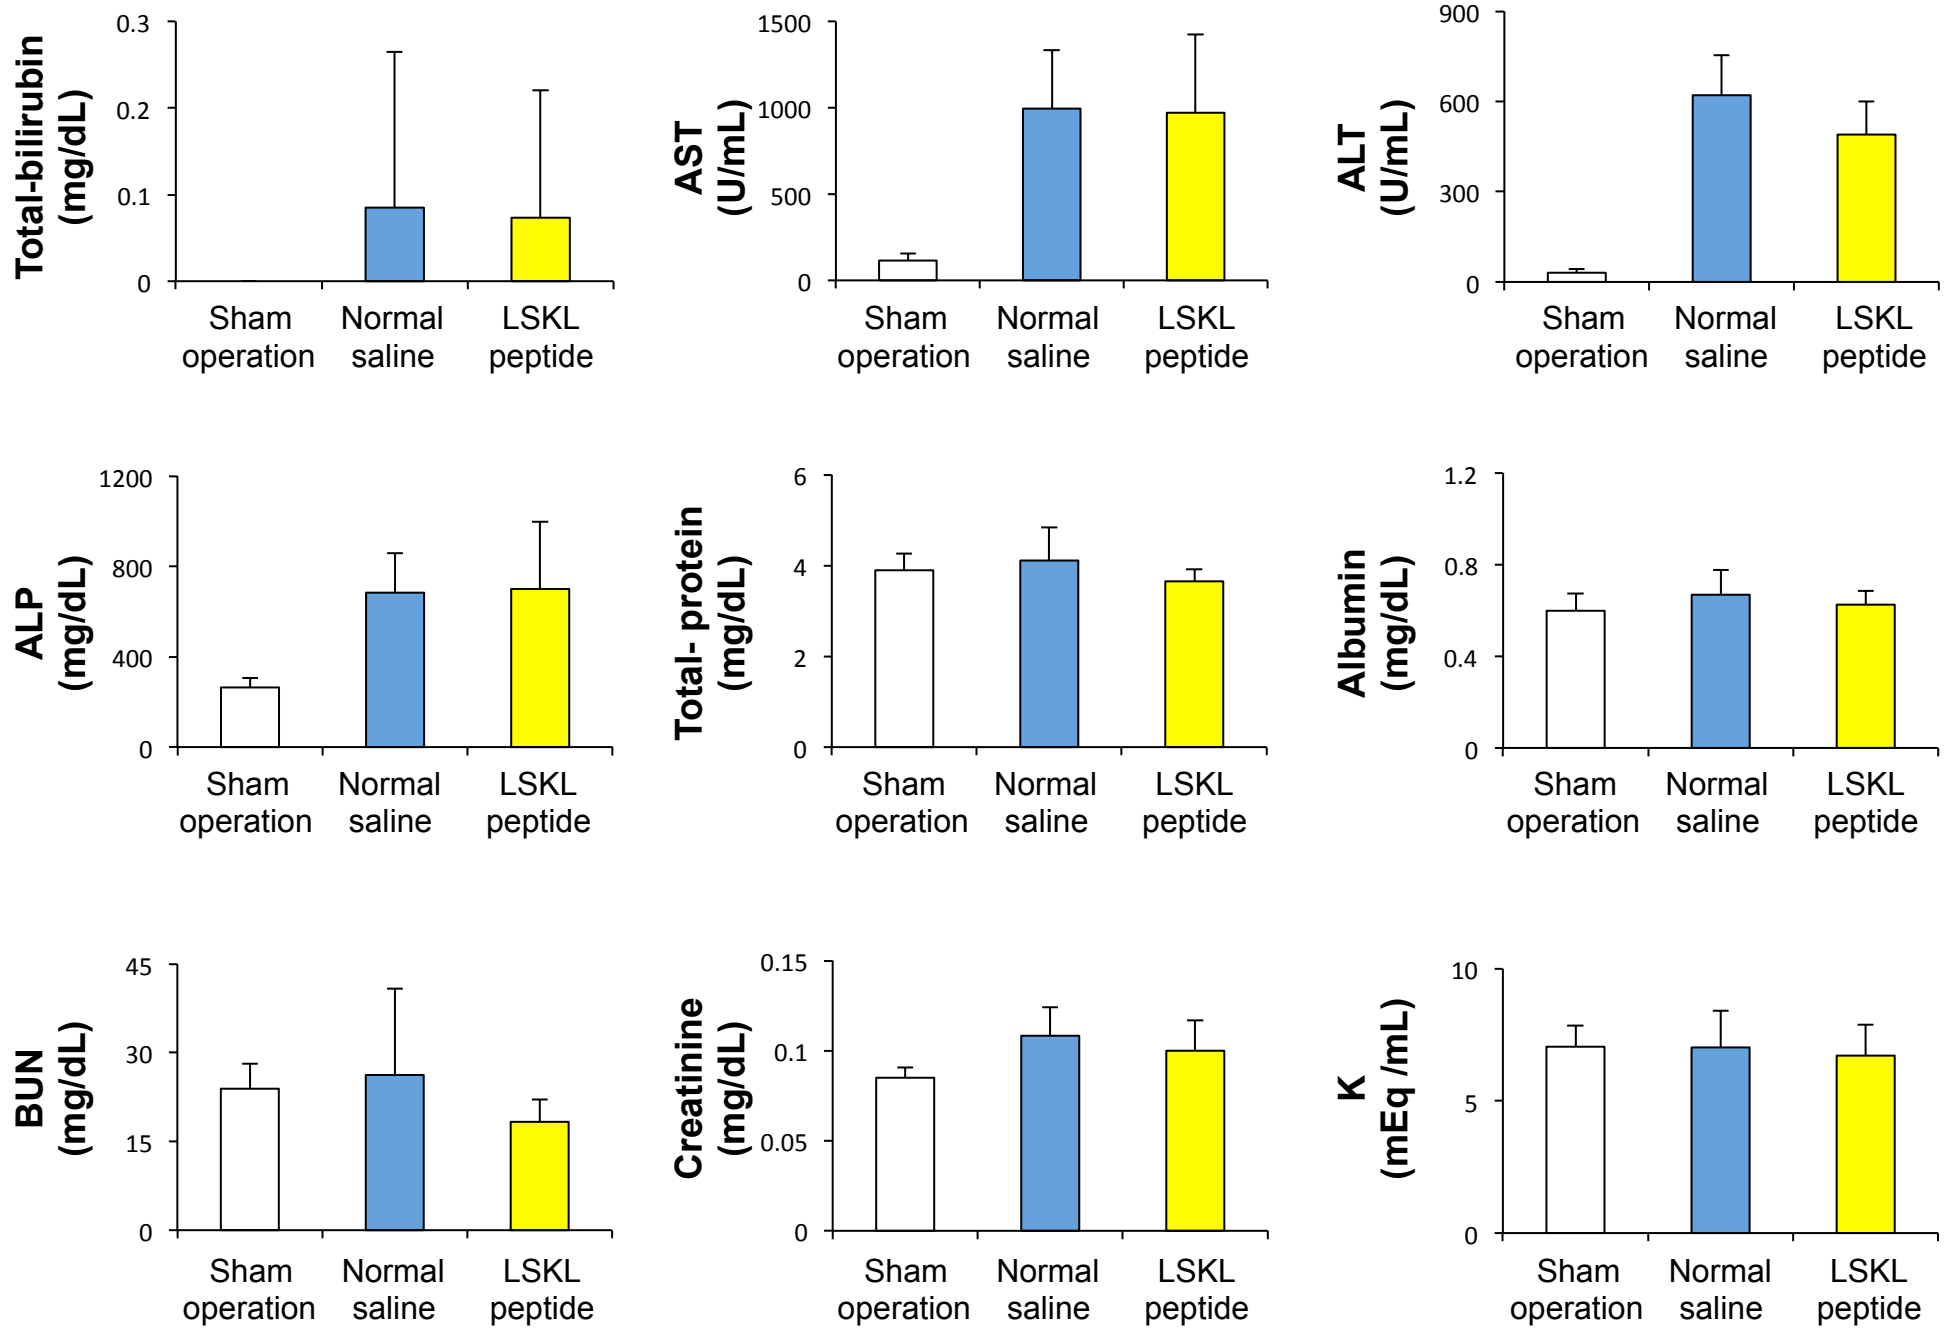

**Supplementary figure 2.**

Supplement: bjs0102-0813-sd4.pdf [file bjs0102-0813-sd4.pdf]
